# Supplementary material for: Revisiting the ionic conductivity of solid oxide electrolytes: a technical review
Source: Royal Society of Chemistry journal article supplement (doi:10.1039/d4ta03852e), 2024-01-01
Supplement: d4ta03852e1.pdf [file d4ta03852e1.pdf]

## Supplementary information

### Revisiting the ionic conductivity of solid oxide electrolytes: A technical review

**Danil E. Matkin,<sup>a,b</sup> Inna A. Starostina,<sup>a,b</sup>**

**Muhammad Bilal Hanif,<sup>c,d</sup> Dmitry A. Medvedev<sup>\*a,b</sup>**

<sup>a</sup> **Laboratory of Electrochemical Devices Based on Solid Oxide Proton Electrolytes,  
Institute of High-Temperature Electrochemistry, 620660 Yekaterinburg, Russia**

<sup>b</sup> **Hydrogen Energy Laboratory, Ural Federal University, 620002 Yekaterinburg, Russia**

<sup>c</sup> **State Key Laboratory for Mechanical Behaviour of Materials, School of Materials  
Science and Engineering, Xi'an Jiaotong University, Xi'an Shannxi 710049, China**

<sup>d</sup> **Department of Inorganic Chemistry, Faculty of Natural Sciences, Comenius University  
in Bratislava, 842 15 Bratislava, Slovakia**

**\*Corresponding author: Dmitry Medvedev, email: [dmitrymedv@mail.ru](mailto:dmitrymedv@mail.ru)**

**Table S1.** The thin-film conductivities of different electrolyte classes obtained for SOFCs and SOECs under open circuit voltage conditions in the intermediate temperature range. The conductivity data were calculated as follows:  $\sigma = h \cdot R_{\text{ohm}}$ , where  $h$  is the electrolyte thickness,  $R_{\text{ohm}}$  is the ohmic resistance determined from the electrochemical impedance spectroscopy data.

| Electrolyte               |                             | Ohmic resistance ( $\Omega \text{ cm}^2$ ) |        |        | Conductivity ( $\text{mS cm}^{-1}$ ) |        |        | Ref. |
|---------------------------|-----------------------------|--------------------------------------------|--------|--------|--------------------------------------|--------|--------|------|
| Composition               | Thickness ( $\mu\text{m}$ ) | 500 °C                                     | 600 °C | 700 °C | 500 °C                               | 600 °C | 700 °C |      |
| YSZ + symmetric GDC films | 10                          | –                                          | –      | 0.1    | –                                    | –      | 7.9    | S1   |
| YSZ + symmetric GDC films | 10                          | –                                          | –      | 0.1    | –                                    | –      | 8.2    | S1   |
| YSZ + symmetric GDC films | 10                          | –                                          | –      | 0.1    | –                                    | –      | 9.5    | S1   |
| YSZ + GDC                 | 18                          | –                                          | 1.7    | 0.7    | –                                    | 1.0    | 2.6    | S2   |
| YSZ + GDC                 | 10                          | –                                          | 0.2    | 0.1    | –                                    | 5.9    | 8.0    | S3   |
| YSZ + GDC                 | 4                           | –                                          | 0.1    | 0.1    | –                                    | 3.3    | 4.0    | S4   |
| YSZ + GDC                 | 5                           | –                                          | –      | 0.2    | –                                    | –      | 2.4    | S5   |
| YSZ + SDC                 | 10                          | –                                          | 0.5    | 0.2    | –                                    | 2.1    | 6.3    | S6   |
| YSZ + GDC                 | 10                          | –                                          | 0.7    | 0.2    | –                                    | 1.5    | 4.5    | S6   |
| YSZ + GDC                 | 10                          | –                                          | –      | 0.3    | –                                    | –      | 3.6    | S7   |
| YSZ + GDC                 | 3                           | –                                          | –      | 0.1    | –                                    | –      | 3.0    | S8   |
| YSZ + GDC                 | 10                          | –                                          | 0.6    | 0.3    | –                                    | 1.7    | 4.0    | S9   |
| YSZ + LDC                 | 10                          | –                                          | 0.5    | 0.2    | –                                    | 2.0    | 4.3    | S9   |
| YSZ + GDC                 | 260                         | –                                          | –      | 2.0    | –                                    | –      | 12.9   | S10  |
| YSZ + GDC                 | 2.5                         | –                                          | 0.6    | 0.2    | –                                    | 0.4    | 1.0    | S11  |
| YSZ + GDC                 | 10                          | –                                          | 0.4    | 0.3    | –                                    | 2.4    | 3.8    | S12  |
| YSZ + GDC                 | 5.8                         | –                                          | –      | 0.2    | –                                    | –      | 2.6    | S13  |
| YSZ + GDC                 | 20                          | –                                          | 2.1    | 0.6    | –                                    | 1.0    | 3.3    | S14  |
| YSZ + SDC                 | 6                           | –                                          | –      | 0.1    | –                                    | –      | 5.0    | S15  |
| YSZ + GDC                 | 5                           | –                                          | 0.3    | 0.2    | –                                    | 1.7    | 3.3    | S16  |
| YSZ + GDC                 | 10                          | –                                          | 0.3    | 0.1    | –                                    | 3.6    | 7.1    | S17  |
| YSZ + GDC                 | 20                          | –                                          | –      | 0.3    | –                                    | –      | 8.0    | S18  |
| YSZ + SDC                 | 7.6                         | –                                          | –      | 0.2    | –                                    | –      | 4.8    | S19  |
| YSZ + GDC                 | 8                           | –                                          | –      | 0.3    | –                                    | –      | 3.1    | S20  |
| YSZ + GDC                 | 19                          | –                                          | –      | 0.2    | –                                    | –      | 8.6    | S21  |
| YSZ + GDC                 | 16                          |                                            | 2.0    | 1.3    |                                      | 0.8    | 1.2    | S22  |
| YSZ + SDC                 | 10.6                        |                                            |        | 0.6    |                                      |        | 1.9    | S23  |
| GDC + YSZ + GDC           | 1.3                         | 0.1                                        | 0.0    | –      | 1.6                                  | 7.8    | –      | S24  |
| ScCeSZ + GDC0.1           | 6                           | –                                          | –      | 0.7    | –                                    | –      | 0.8    | S25  |
| ScSZ                      | 0.3                         | 0.3                                        | –      | –      | 0.1                                  | –      | –      | S26  |
| ScSZ                      | 15                          | –                                          | –      | 0.5    | –                                    | –      | 3.1    | S27  |

| Electrolyte |                             | Ohmic resistance ( $\Omega \text{ cm}^2$ ) |        |        | Conductivity ( $\text{mS cm}^{-1}$ ) |        |        | Ref. |
|-------------|-----------------------------|--------------------------------------------|--------|--------|--------------------------------------|--------|--------|------|
| Composition | Thickness ( $\mu\text{m}$ ) | 500 °C                                     | 600 °C | 700 °C | 500 °C                               | 600 °C | 700 °C |      |
| ScSZ        | 12                          | –                                          | –      | 0.2    | –                                    | –      | 8.0    | S28  |
| ScCeSZ      | 15                          | –                                          | 0.6    | 0.4    | –                                    | 2.6    | 3.9    | S29  |
| CeSSZ       | 35                          | –                                          | 0.7    | 0.3    | –                                    | 4.9    | 13.0   | S30  |
| GDC/ScSZ    | 4                           | –                                          | 0.5    | 0.3    | –                                    | 0.9    | 1.5    | S31  |
| ScSZ/SDC    | 5                           | –                                          | –      | 0.3    | –                                    | –      | 1.6    | S32  |
| GDC–ScSZ    | 25                          | 0.3                                        | 0.2    | 0.2    | 8.6                                  | 11.9   | 13.9   | S33  |
| BCZYYb      | 14                          | 0.3                                        | 0.1    | –      | 5.0                                  | 10.0   | –      | S34  |
| BCZYYb      | 14                          | –                                          | 0.2    | 0.1    | –                                    | 7.9    | 12.2   | S34  |
| BCZYYb      | 11.8                        | 0.4                                        | 0.2    | –      | 3.1                                  | 4.8    | –      | S35  |
| BCZYYb      | 11.8                        | 0.4                                        | 0.3    | –      | 2.8                                  | 4.0    | –      | S35  |
| BCZYYb      | 21                          | –                                          | 0.5    | 0.3    | –                                    | 4.5    | 6.9    | S36  |
| BCZYYb4411  | 21                          | –                                          | 0.5    | 0.3    | –                                    | 4.5    | 6.8    | S36  |
| BCZYYb4411  | 21                          | –                                          | 0.4    | 0.2    | –                                    | 5.7    | 8.6    | S36  |
| BCZYYb4411  | 21                          | –                                          | 0.5    | 0.3    | –                                    | 4.3    | 6.5    | S36  |
| BCZYYb4411  | 6                           | 0.2                                        | 0.2    | –      | 2.5                                  | 3.6    | –      | S37  |
| BZCYY       | 6                           | 0.3                                        | –      | –      | 2.0                                  | –      | –      | S37  |
| BZCYY       | 6                           | 0.3                                        | 0.2    | –      | 1.7                                  | 2.6    | –      | S37  |
| BZCYY       | 6                           | 0.4                                        | –      | –      | 1.3                                  | –      | –      | S37  |
| BZCYY       | 6                           | 0.2                                        | 0.1    | –      | 3.0                                  | 4.6    | –      | S37  |
| BZCYY       | 6                           | 0.3                                        | –      | –      | 2.3                                  | –      | –      | S37  |
| BZCYY       | 15                          | 1.0                                        | 0.4    | –      | 1.6                                  | 3.7    | –      | S38  |
| BCZYYb      | 15                          | –                                          | 0.3    | –      | –                                    | 5.2    | –      | S38  |
| BCZYYb      | 15                          | –                                          | 0.3    | –      | –                                    | 5.8    | –      | S38  |
| BCZYYb      | 25                          | 0.9                                        | 0.6    | –      | 2.7                                  | 4.3    | –      | S39  |
| BCZYSm13    | 11                          | 0.9                                        | 0.5    | –      | 1.2                                  | 2.0    | –      | S40  |
| BCZYYb      | 11                          | 0.6                                        | 0.4    | –      | 1.8                                  | 3.0    | –      | S40  |
| BCZYYb      | 11                          | 0.5                                        | 0.3    | –      | 2.1                                  | 3.5    | –      | S40  |
| BCZYYb      | 11                          | 0.3                                        | 0.2    | –      | 3.4                                  | 5.9    | –      | S40  |
| BCZYYb      | 11                          | 0.4                                        | 0.2    | –      | 2.5                                  | 4.8    | –      | S40  |
| BCZYYb      | 22                          | –                                          | 0.5    | 0.3    | –                                    | 4.5    | 7.1    | S41  |
| BCZYYb4411  | 22                          | –                                          | 0.4    | 0.3    | –                                    | 5.2    | 7.7    | S41  |
| BCZYYb4411  | 12                          | 0.6                                        | 0.4    | 0.3    | 1.9                                  | 2.9    | 3.8    | S42  |
| BCZYYb      | 12                          | 0.6                                        | 0.4    | 0.3    | 2.0                                  | 3.0    | 4.6    | S42  |
| BCZYYb0.95  | 15                          | –                                          | 0.4    | 0.2    | –                                    | 4.2    | 6.3    | S43  |
| BZCY        | 15                          | 2.3                                        | 1.6    | 1.5    | 0.7                                  | 0.9    | 1.0    | S44  |

| Electrolyte          |                             | Ohmic resistance ( $\Omega \text{ cm}^2$ ) |        |        | Conductivity ( $\text{mS cm}^{-1}$ ) |        |        | Ref. |
|----------------------|-----------------------------|--------------------------------------------|--------|--------|--------------------------------------|--------|--------|------|
| Composition          | Thickness ( $\mu\text{m}$ ) | 500 °C                                     | 600 °C | 700 °C | 500 °C                               | 600 °C | 700 °C |      |
| BCZYYb               | 16                          | –                                          | 0.9    | –      | –                                    | 1.8    | –      | S45  |
| SZCY541              | 10                          | 0.3                                        | 0.3    | –      | 3.2                                  | 3.6    | –      | S46  |
| BCZYYb               | 8                           | 0.6                                        | –      | –      | 1.2                                  | –      | –      | S47  |
| BCZYYb4411           | 17                          | 0.6                                        | 0.4    | 0.3    | 2.7                                  | 4.5    | 6.5    | S48  |
| BZCYb(1%NiO)         | 45                          | –                                          | 0.3    | 0.2    | –                                    | 17.3   | 30.0   | S49  |
| BZCY7                | 21                          | –                                          | 0.2    | 0.2    | –                                    | 8.5    | 11.8   | S50  |
| BZCYb                | 15                          | 0.6                                        | 0.4    | 0.3    | 2.5                                  | 3.7    | 5.4    | S51  |
| BCZY44               | 5                           | 0.5                                        | 0.6    | –      | 1.0                                  | 0.8    | –      | S52  |
| SDC                  | 300                         | –                                          | –      | 0.5    | –                                    | –      | 61.2   | S53  |
| SDC                  | 14                          | 1.7                                        | 0.7    | –      | 0.8                                  | 2.0    | –      | S54  |
| GDC0.1               | 20                          | 0.5                                        | 0.2    | –      | 4.3                                  | 10.2   | –      | S55  |
| GDC0.1               | 20                          | 0.3                                        | 0.2    | –      | 5.9                                  | 11.6   | –      | S55  |
| GDC                  | 8                           | –                                          | 0.2    | 0.2    | –                                    | 3.3    | 4.5    | S56  |
| GDC                  | 15                          | –                                          | –      | 0.3    | –                                    | –      | 5.0    | S57  |
| GDC                  | 174                         | –                                          | –      | 0.7    | –                                    | –      | 24.9   | S58  |
| SDC                  | 300                         | –                                          | –      | 0.5    | –                                    | –      | 62.5   | S59  |
| GDC                  | 320                         | –                                          | –      | 0.2    | –                                    | –      | 160.0  | S60  |
| SDC                  | 10                          | 0.5                                        | 0.3    | –      | 2.2                                  | 3.7    | –      | S61  |
| SDC                  | 30                          | 0.6                                        | 0.3    | 0.2    | 4.9                                  | 11.5   | 16.7   | S62  |
| GDC                  | 7                           | –                                          | 0.1    | 0.5    | –                                    | 6.9    | 1.6    | S63  |
| SDC                  | 10                          | –                                          | 0.3    | 0.1    | –                                    | 3.0    | 8.1    | S64  |
| SmNdDC               | 190                         | –                                          | 0.9    | 0.4    | –                                    | 21.6   | 52.8   | S65  |
| LSGM                 | 300                         | –                                          | –      | 0.4    | –                                    | –      | 78.9   | S66  |
| LSGM'                | 19                          | 0.4                                        | 0.2    | –      | 5.1                                  | 11.2   | –      | S67  |
| LSGM                 | 9.8                         | –                                          | 0.4    | 0.2    | –                                    | 2.5    | 4.4    | S68  |
| SDC + LSGM0.2 + SDC  | 20                          | –                                          | 0.1    | 0.1    | –                                    | 14.3   | 33.3   | S69  |
| LSGM                 | 150                         | –                                          | 0.5    | 0.2    | –                                    | 31.3   | 65.2   | S70  |
| LSGM0.2              | 50                          | –                                          | 0.3    | –      | –                                    | 15.6   | –      | S71  |
| LSGM                 | 25                          | 2.3                                        | 0.8    | 0.7    | 1.1                                  | 3.1    | 3.8    | S72  |
| LSGM                 | 19                          | –                                          | 0.3    | 0.1    | –                                    | 5.8    | 15.8   | S73  |
| LSGM + LDC46 + LDC   | 23                          | –                                          | 0.5    | 0.2    | –                                    | 4.4    | 10.5   | S74  |
| LDC46 + LSGM + LDC46 | 3.4                         | –                                          | –      | 0.1    | –                                    | –      | 2.4    | S75  |
| LSGM''               | 50                          | –                                          | 0.3    | 0.2    | –                                    | 18.5   | 31.3   | S76  |
| LSGM0.2              | 500                         | –                                          | –      | 1.0    | –                                    | –      | 52.1   | S77  |
| LSGM''' + SDC        | 40                          | –                                          | 1.4    | 1.0    | –                                    | 2.8    | 3.8    | S78  |

| Electrolyte |                             | Ohmic resistance ( $\Omega \text{ cm}^2$ ) |        |        | Conductivity ( $\text{mS cm}^{-1}$ ) |        |        | Ref. |
|-------------|-----------------------------|--------------------------------------------|--------|--------|--------------------------------------|--------|--------|------|
| Composition | Thickness ( $\mu\text{m}$ ) | 500 °C                                     | 600 °C | 700 °C | 500 °C                               | 600 °C | 700 °C |      |
| LSGM        | 39                          | 1.7                                        | 0.6    | 0.3    | 2.2                                  | 6.6    | 15.6   | S79  |
| LSGM        | 17                          | 0.2                                        | 0.1    | –      | 11.3                                 | 22.7   | –      | S80  |
| LSGM0.2     | 40                          | –                                          | –      | 0.2    | –                                    | –      | 20.0   | S81  |
| LSGM'       | 200                         | –                                          | 0.8    | 0.2    | –                                    | 26.0   | 85.8   | S82  |
| LSGM8282    | 300                         | –                                          | –      | 0.3    | –                                    | –      | 93.8   | S83  |
| LSGM        | 75                          | –                                          | –      | 0.2    | –                                    | –      | 32.6   | S84  |
| BZYN        | 12                          | 1.2                                        | 0.6    | 0.3    | 1.0                                  | 2.0    | 4.6    | S85  |
| BZY20       | 20                          | –                                          | 0.4    | –      | –                                    | 4.5    | –      | S86  |
| BZY20       | 35                          | 1.6                                        | 0.7    | 0.5    | 2.2                                  | 5.4    | 6.6    | S87  |
| BZY20       | 20                          | –                                          | 1.5    | 0.7    | –                                    | 1.4    | 2.9    | S88  |
| BZY20       | 30                          | –                                          | 1.3    | 0.6    | –                                    | 2.3    | 5.4    | S89  |
| BZY20       | 25                          | –                                          | 3.2    | –      | –                                    | 0.8    | –      | S90  |
| BZYZ        | 20                          | –                                          | 1.2    | –      | –                                    | 1.7    | –      | S91  |
| BZY20       | 5                           | –                                          | 0.9    | 0.5    | –                                    | 0.5    | 1.0    | S92  |
| BZY20       | 16                          | –                                          | –      | 1.0    | –                                    | –      | 1.6    | S93  |
| BZY20       | 23                          | –                                          | 1.7    | –      | –                                    | 1.3    | –      | S94  |
| BZYCa       | 15                          | –                                          | 1.6    | 0.8    | –                                    | 1.0    | 2.0    | S95  |
| BZYCa'      | 25                          | 2.4                                        | 1.8    | 1.0    | 1.0                                  | 1.4    | 2.6    | S96  |
| BZY20       | 4                           | 4.7                                        | 2.0    | –      | 0.1                                  | 0.2    | –      | S97  |
| BZYIn       | 12                          | –                                          | 0.6    | 0.3    | –                                    | 2.1    | 3.5    | S98  |
| BZYSm       | 25                          | –                                          | 1.8    | 1.0    | –                                    | 1.4    | 2.6    | S99  |

Electrolytes: GDC =  $\text{Ce}_{0.8}\text{Gd}_{0.2}\text{O}_{2-\delta}$ , BCZYYb =  $\text{BaZr}_{0.1}\text{Ce}_{0.7}\text{Y}_{0.1}\text{Yb}_{0.1}\text{O}_{3-\delta}$ , BCZYYb4411 =  $\text{BaCe}_{0.4}\text{Zr}_{0.4}\text{Y}_{0.1}\text{Yb}_{0.1}\text{O}_{3-\delta}$ , BZCYY =  $\text{BaZr}_{0.5}\text{Ce}_{0.3}\text{Y}_{0.1}\text{Yb}_{0.1}\text{O}_{3-\delta}$ , BCZYSm13 =  $\text{BaCe}_{0.7}\text{Zr}_{0.1}\text{Y}_{0.07}\text{Sm}_{0.13}\text{O}_{3-\delta}$ , BCZYYb0.95 =  $\text{Ba}(\text{Zr}_{0.1}\text{Ce}_{0.7}\text{Y}_{0.1}\text{Yb}_{0.1})_{0.95}\text{O}_{3-\delta}$ , BZCY =  $\text{BaZr}_{0.1}\text{Ce}_{0.7}\text{Y}_{0.2}\text{O}_{3-\delta}$ , SZCY541 =  $\text{SrZr}_{0.5}\text{Ce}_{0.4}\text{Y}_{0.1}\text{O}_{3-\delta}$ , LDC =  $\text{Ce}_{0.9}\text{La}_{0.1}\text{O}_{1.95}$ , LCP = La/Pr co-doped  $\text{CeO}_2 = \text{La}_{0.33}\text{Ce}_{0.62}\text{Pr}_{0.05}\text{O}_{2-\delta}$ , SDC =  $\text{Sm}_{0.2}\text{Ce}_{0.8}\text{O}_{1.9}$ , LSGM =  $\text{La}_{0.9}\text{Sr}_{0.1}\text{Ga}_{0.8}\text{Mg}_{0.2}\text{O}_3$ , ScCeSZ =  $(\text{Sc}_2\text{O}_3)_{0.10}(\text{CeO}_2)_{0.01}(\text{ZrO}_2)_{0.89}$ , CeSSZ = 1 mol%  $\text{CeO}_2$  codoped 10 mol %  $\text{Sc}_2\text{O}_3\text{-ZrO}_2$ , GDC<sub>0.1</sub> =  $\text{Gd}_{0.1}\text{Ce}_{0.9}\text{O}_{1.95}$ , BCZY44 =  $\text{BaCe}_{0.4}\text{Zr}_{0.4}\text{Y}_{0.2}\text{O}_{3-\delta}$ , BZCY7 =  $\text{BaZr}_{0.1}\text{Ce}_{0.7}\text{Y}_{0.2}\text{O}_{3-\delta}$ , LSGM0.2 =  $\text{La}_{0.8}\text{Sr}_{0.2}\text{Ga}_{0.8}\text{Mg}_{0.2}\text{O}_3$ , BZYN =  $\text{BaZr}_{0.76}\text{Y}_{0.2}\text{Ni}_{0.04}\text{O}_{3\delta}$ , SmNdDC =  $\text{Sm}_{0.075}\text{Nd}_{0.075}\text{Ce}_{0.85}\text{O}_{2-\delta}$ , LSGM' =  $\text{La}_{0.8}\text{Sr}_{0.2}\text{Ga}_{0.83}\text{Mg}_{0.17}\text{O}_{3-\delta}$ , LDC46 =  $\text{Ce}_{0.6}\text{La}_{0.4}\text{O}_{2-\delta}$ , LSGM'' =  $\text{La}_{0.87}\text{Sr}_{0.13}\text{Ga}_{0.88}\text{Mg}_{0.12}\text{O}_{3-\delta}$ , LSGM''' =  $\text{La}_{0.88}\text{Sr}_{0.12}\text{Ga}_{0.82}\text{Mg}_{0.18}\text{O}_{3-\delta}$ , LSGM8282 =  $\text{La}_{0.8}\text{Sr}_{0.2}\text{Ga}_{0.8}\text{Mg}_{0.2}\text{O}_3$ , BZYZ =  $\text{BaZr}_{0.8}\text{Y}_{0.16}\text{Zn}_{0.04}\text{O}_{3-\delta}$ , BZYZCa =  $\text{BaZr}_{0.8}\text{Y}_{0.15}\text{Ca}_{0.05}\text{O}_{3-\delta}$ , BZYCa' =  $\text{BaZr}_{0.8}\text{Y}_{0.2}\text{O}_{3-\delta} + 4 \text{ mol}\% \text{CaO}$ , BZYIn =  $\text{BaZr}_{0.8}\text{Y}_{0.15}\text{In}_{0.05}\text{O}_{3-\delta}$ , BZYSm =  $\text{BaZr}_{0.8}\text{Y}_{0.15}\text{Sm}_{0.05}\text{O}_{3-\delta}$

## References

- S1. X. Wang, T. Zhang, P. Qiu, H. Qi and B. Tu, *Int. J. Hydrogen Energy*, 2024, **51**, 1136, DOI: <https://doi.org/10.1016/j.ijhydene.2023.11.013>
- S2. W. Wang, X. Zhang, K. Khan, H. Wu, D. Zhang, Y. Yang, Y. Jiang and B. Lin, *Int. J. Hydrogen Energy*, 2021, **46**, 5593, DOI: <https://doi.org/10.1016/j.ijhydene.2020.11.020>
- S3. H. Qi, Z. Zhao, B. Tu and M. Cheng, *J. Power Sources*, 2020, **455**, 227971, DOI: <https://doi.org/10.1016/j.jpowsour.2020.227971>

- S4.** Y. Li, D. Cuil, H. Qi, Z. Zhao, Y. Guo and M. Cheng, *Electrochemistry*, 2020, **88**, 290, DOI: <https://doi.org/10.5796/electrochemistry.20-00018>
- S5.** L. Cheng, Q. Lyu, Z. Li, Y. Liu, C. Jin, N. Xu, Q. Zhong and T. Zhu, *Int. J. Appl. Ceram. Technol.*, 2023, **20**, 2341, DOI: <https://doi.org/10.1111/ijac.14346>
- S6.** Y. Wu, J. Sang, Z. Liu, H. Fan, B. Cao, Q. Wang, J. Yang, W. Guan, X. Liu and J. Wang, *Ceram. Int.*, 2023, **49**, 20290, DOI: <https://doi.org/10.1016/j.ceramint.2023.03.152>
- S7.** F. Liang, J. Yang, H. Wang and J. Wu, *Int. J. Miner., Met. Mater.*, 2023, **30**, 1190, DOI: <https://doi.org/10.1007/s12613-023-2620-y>
- S8.** A. A. Solovyev, A. V. Shipilova, S. V. Rabotkin, E. A. Smolyanskiy and A. N. Shmakov, *Int. J. Hydrogen Energy*, 2022, **47**, 37967, DOI: <https://doi.org/10.1016/j.ijhydene.2022.08.281>
- S9.** H. Sumi, S. Takahashi, Y. Yamaguchi and H. Shimada, *J. Asian Ceram. Soc.*, 2021, **9**, 609, DOI: <https://doi.org/10.1080/21870764.2021.1905254>
- S10.** S. Zhou, Y. Yang, H. Chen and Y. Ling, *Ceram. Int.*, 2020, **46**, 18331, DOI: <https://doi.org/10.1016/j.ceramint.2020.05.057>
- S11.** G. DiGiuseppe, D. Thompson, C. Gumeci, A. M. Hussain and N. Dale, *Ionics*, 2019, **25**, 3537, DOI: <https://doi.org/10.1007/s11581-019-02935-4>
- S12.** D. Tian, Y. Yang, Y. Chen, X. Lu and B. Lin, *Mater. Res. Express*, 2019, **6**, 096310, DOI: <https://doi.org/10.1088/2053-1591/ab2ee8>
- S13.** B. H. Yun, K. J. Kim, D. W. Joh, M. S. Chae, J. J. Lee, D. Kim, S. Kang, D. Choi, S. T. Hong and K. T. Lee, *J. Mater. Chem. A*, 2019, **7**, 20558, DOI: <https://doi.org/10.1039/c9ta09203j>
- S14.** M. J. López-Robledo, M. A. Laguna-Bercero, A. Larrea and V. M. Orera, *J. Power Sources*, 2018, **378**, 184, DOI: <https://doi.org/10.1016/j.jpowsour.2017.12.035>
- S15.** Z. Lu, S. Darvish, J. Hardy, J. Templeton, J. Stevenson and Y. Zhong, *J. Electrochem. Soc.*, 2017, **164**, F3097, DOI: <https://doi.org/10.1149/2.0141710jes>
- S16.** B. Liang, S. Zhang, S. Lu, S. Sui and J. Shang, *Int. J. Appl. Ceram. Technol.*, 2017, **14**, 185, DOI: <https://doi.org/10.1111/ijac.12625>
- S17.** W. Wu, Z. Zhao, X. Zhang, Z. Liu, D. Cui, B. Tu, D. Ou and M. Cheng, *Electrochem. Commun.*, 2016, **71**, 43, DOI: <https://doi.org/10.1016/j.elecom.2016.08.005>
- S18.** X. Zhang, W. Wu, Z. Zhao, B. Tu, D. Ou, D. Cui and M. Cheng, *Catal. Sci. & Technol.*, 2016, **6**, 4945, DOI: <https://doi.org/10.1039/c5cy02232k>
- S19.** J. Qian, J. Hou, Z. Tao and W. Liu, *J. Alloys Compd.*, 2015, **631**, 255, DOI: <https://doi.org/10.1016/j.jallcom.2015.01.124>
- S20.** C. Jeong, J. H. Lee, M. Park, J. Hong, H. Kim, J. W. Son, J. H. Lee, B. K. Kim and K. J. Yoon, *J. Power Sources*, 2015, **297**, 370, DOI: <https://doi.org/10.1016/j.jpowsour.2015.08.023>
- S21.** H. G. Desta, D. Tian, Q. Yang, S. Zhu, K. Song, Y. Chen and B. Lin, *Chem. Phys. Lett.*, 2022, **806**, 140037, DOI: <https://doi.org/10.1016/j.cplett.2022.140037>
- S22.** S. Y. Park, J. H. Ahn, C. W. Jeong, C. W. Na, R. H. Song and J. H. Lee, *Int. J. Hydrogen Energy*, 2014, **39**, 12894, DOI: <https://doi.org/10.1016/j.ijhydene.2014.06.103>
- S23.** J. C. Chang, M. C. Lee, R. J. Yang, Y. C. Chang, T. N. Lin, C. H. Wang, W. X. Kao and L. S. Lee, *J. Power Sources*, 2011, **196**, 3129, DOI: <https://doi.org/10.1016/j.jpowsour.2010.12.036>
- S24.** M. Moon, P. Guha, S. Oh, H. Jung, S. Yang, J. H. Lee, Y. Jun, J. W. Son and D. H. Kwon, *J. Power Sources*, 2024, **589**, 233774, DOI: <https://doi.org/10.1016/j.jpowsour.2023.233774>
- S25.** A. Hussain, M. Z. Khan, R. H. Song, J. E. Hong, S. B. Lee and T. H. Lim, *ECS Trans.*, 2019, **91**, 373, DOI: <https://doi.org/10.1149/09101.0373ecst>
- S26.** G. Y. Cho, Y. H. Lee, S. W. Hong, J. Bae, J. An, Y. B. Kim and S. W. Cha, *Int. J. Hydrogen Energy*, 2015, **40**, 15704, DOI: <https://doi.org/10.1016/j.ijhydene.2015.09.124>
- S27.** B. Huang, X. F. Ye, S. R. Wang, H. W. Nie, R. Z. Liu and T. L. Wen, *Mater. Res. Bull.*, 2007, **42**, 1705, DOI: <https://doi.org/10.1016/j.materresbull.2006.11.027>
- S28.** S. W. Shin, A. Hussain, M. Z. Khan, D. W. Joh, T. H. Lim, S. B. Lee, J. E. Hong, J. H. Shim and R. H. Song, *Prog. Nat. Sci.: Mater. Int.*, 2023, **33**, 733, DOI: <https://doi.org/10.1016/j.pnsc.2023.12.012>
- S29.** Y. Meng, H. Zheng, J. Duffy, H. Huang, K. He, J. Tong and K. S. Brinkman, *J. Power Sources*, 2023, **560**, 232724, DOI: <https://doi.org/10.1016/j.jpowsour.2023.232724>
- S30.** T. Yamaguchi, S. Shimizu, T. Suzuki, Y. Fujishiro and M. Awano, *J. Electrochem. Soc.*, 2008, **155**, B423, DOI: <https://doi.org/10.1149/1.2839618>
- S31.** H. Shi, R. Ran and Z. Shao, *Int. J. Hydrogen Energy*, 2012, **37**, 1125, DOI: <https://doi.org/10.1016/j.ijhydene.2011.02.077>
- S32.** T. Suzuki, B. Liang, T. Yamaguchi, H. Sumi, K. Hamamoto and Y. Fujishiro, *J. Power Sources*, 2012, **199**, 170, DOI: <https://doi.org/10.1016/j.jpowsour.2011.10.046>
- S33.** Q. Li, X. Wang, C. Li, X. Yang, L. Jia and J. Li, *Compos. Part B: Eng.*, 2022, **229**, 109462, DOI: <https://doi.org/10.1016/j.compositesb.2021.109462>

- S34.** R. Song, X. Zhang, D. Huan, X. Li, N. Shi, C. Xia, R. Peng and Y. Lu, *Int. J. Hydrogen Energy*, 2023, **48**, 32943, DOI: <https://doi.org/10.1016/j.ijhydene.2023.04.351>
- S35.** X. Wang, W. Li, C. Zhou, M. Xu, Z. Hu, C. W. Pao, W. Zhou and Z. Shao, *ACS Appl. Mater. & Interfaces*, 2023, **15**, 1339, DOI: <https://doi.org/10.1021/acsami.2c19343>
- S36.** P. Qiu, B. Liu, L. Wu, H. Qi, B. Tu, J. Li and L. Jia, *J. Adv. Ceram.*, 2022, **11**, 1988, DOI: <https://doi.org/10.1007/s40145-022-0662-7>
- S37.** S. H. Hwang, S. K. Kim, J. T. Nam and J. S. Park, *Int. J. Hydrogen Energy*, 2021, **46**, 33551, DOI: <https://doi.org/10.1016/j.ijhydene.2021.07.179>
- S38.** L. Zhu, R. O'Hayre and N. P. Sullivan, *Int. J. Hydrogen Energy*, 2021, **46**, 27784, DOI: <https://doi.org/10.1016/j.ijhydene.2021.06.018>
- S39.** Y. Meng, J. Duffy, B. T. Na, J. Gao, T. Yang, J. Tong, S. Lee and K. S. Brinkman, *Solid State Ion.*, 2021, **368**, 115639, DOI: <https://doi.org/10.1016/j.ssi.2021.115639>
- S40.** H. Lee, H. Jung, C. Kim, S. Kim, I. Jang, H. Yoon, U. Paik and T. Song, *ACS Appl. Energy Mater.*, 2021, **4**, 11564, DOI: <https://doi.org/10.1021/acsaem.1c02311>
- S41.** J. Li, J. Hou, Y. Lu, Q. Wang, X. Xi, Y. Fan, X. Z. Fu and J. L. Luo, *J. Power Sources*, 2020, **453**, 227909, DOI: <https://doi.org/10.1016/j.jpowsour.2020.227909>
- S42.** F. He, M. Liang, W. Wang, R. Ran, G. Yang, W. Zhou and Z. Shao, *Energy & Fuels*, 2020, **34**, 11464, DOI: <https://doi.org/10.1021/acs.energyfuels.0c02370>
- S43.** K. Wei, N. Li, Y. Wu, W. Song, X. Wang, L. Guo, M. Khan, S. Wang, F. Zhou and Y. Ling, *Ceram. Int.*, 2019, **45**, 18583, DOI: <https://doi.org/10.1016/j.ceramint.2019.06.081>
- S44.** M. Shang, J. Tong and R. O'Hayre, *RSC Adv.*, 2013, **3**, 15769, DOI: <https://doi.org/10.1039/c3ra41828f>
- S45.** K. Leonard, M. E. Ivanova, A. Weber, W. Deibert, W. A. Meulenber, T. Ishihara and H. Matsumoto, *Solid State Ion.*, 2022, **379**, 115918, DOI: <https://doi.org/10.1016/j.ssi.2022.115918>
- S46.** Y. Xu, F. Hu, Y. Guo, J. Zhang, Y. Huang, W. Zhou, J. Sun, B. He and L. Zhao, *Sep. Purif. Technol.*, 2022, **297**, 121482, DOI: <https://doi.org/10.1016/j.seppur.2022.121482>
- S47.** Z. Pan, C. Duan, T. Pritchard, A. Thatte, E. White, R. Braun, R. O'Hayre and N. P. Sullivan, *Appl. Catal. B: Environ.*, 2022, **307**, 121196, DOI: <https://doi.org/10.1016/j.apcatb.2022.121196>
- S48.** Q. Zhang, Y. Hou, L. Chen, L. Wang and K. Chou, *Ceram. Int.*, 2022, **48**, 17816, DOI: <https://doi.org/10.1016/j.ceramint.2022.03.052>
- S49.** H. Liu, K. Zhu, Y. Liu, W. Li, L. Cai, X. Zhu, M. Cheng and W. Yang, *Electrochimica Acta*, 2018, **279**, 224, DOI: <https://doi.org/10.1016/j.electacta.2018.05.086>
- S50.** J. Liu, J. Ding, L. Miao, Z. Gong, K. Li and W. Liu, *J. Alloys Compd.*, 2019, **786**, 163, DOI: <https://doi.org/10.1016/j.jallcom.2019.01.312>
- S51.** Y. Ling, J. Yu, B. Lin, X. Zhang, L. Zhao and X. Liu, *J. Power Sources*, 2011, **196**, 2631, DOI: <https://doi.org/10.1016/j.jpowsour.2010.11.017>
- S52.** N. Nasani, D. Ramasamy, S. Mikhalev, A. V. Kovalevsky and D. P. Fagg, *J. Power Sources*, 2015, **278**, 582, DOI: <https://doi.org/10.1016/j.jpowsour.2014.12.124>
- S53.** X. Yu, J. Fan and L. Xue, *Ceram. Int.*, 2014, **40**, 13627, DOI: <https://doi.org/10.1016/j.ceramint.2014.05.089>
- S54.** C. J. Fu, Q. L. Liu, S. H. Chan, X. M. Ge and G. Pasciak, *Int. J. Hydrogen Energy*, 2010, **35**, 11200, DOI: <https://doi.org/10.1016/j.ijhydene.2010.07.049>
- S55.** J. Hou, F. Liu, Z. Gong, Y. Wu and W. Liu, *J. Power Sources*, 2015, **299**, 32, DOI: <https://doi.org/10.1016/j.jpowsour.2015.08.077>
- S56.** H. Y. Jung, K. S. Hong, H. G. Jung, H. Kim, H. R. Kim, J. W. Son, J. Kim, H. W. Lee and J. H. Lee, *J. Electrochem. Soc.*, 2007, **154**, B480, DOI: <https://doi.org/10.1149/1.2712131>
- S57.** Z. Jiang, A. L. Snowdon, A. Siddiq, A. El-kharouf and R. Steinberger-Wilckens, *Ceram. Int.*, 2022, **48**, 32844, DOI: <https://doi.org/10.1016/j.ceramint.2022.07.211>
- S58.** T. Chen, Z. Lu, G. Zeng, Y. Xie, J. Xiao and Z. Xu, *J. Power Sources*, 2024, **591**, 233886, DOI: <https://doi.org/10.1016/j.jpowsour.2023.233886>
- S59.** J. Shen, G. Yang, Z. Zhang, M. O. Tadé, W. Zhou and Z. Shao, *J. Power Sources*, 2017, **342**, 644, DOI: <https://doi.org/10.1016/j.jpowsour.2016.12.109>
- S60.** X. Chen, J. Wang, Q. Liang, X. Sun, X. Zhu, D. Zhou and J. Meng, *Solid State Sci.*, 2020, **100**, 106108, DOI: <https://doi.org/10.1016/j.solidstatesciences.2019.106108>
- S61.** M. Chen, B. H. Kim, Q. Xu, B. G. Ahn and D. P. Huang, *J. Membr. Sci.*, 2010, **360**, 461, DOI: <https://doi.org/10.1016/j.memsci.2010.05.045>
- S62.** M. Liu, D. Ding, Y. Bai, T. He and M. Liu, *J. Electrochem. Soc.*, 2012, **159**, B661, DOI: <https://doi.org/10.1149/2.032206jes>
- S63.** J. Choi, B. Kim and D. Shin, *J. Eur. Ceram. Soc.*, 2013, **33**, 2269, DOI: <https://doi.org/10.1016/j.jeurceramsoc.2013.01.015>
- S64.** M. Liu, F. Uba and Y. Liu, *J. Am. Ceram. Soc.*, 2020, **103**, 5325, DOI: <https://doi.org/10.1111/jace.17203>

- S65.** J. Qian, C. Lin, Z. Chen, J. Huang, N. Ai, S. P. Jiang, X. Zhou, X. Wang, Y. Shao and K. Chen, *Appl. Catal. B: Environ. Energy*, 2024, **346**, 123742, DOI: <https://doi.org/10.1016/j.apcatb.2024.123742>
- S66.** Z. Yang, C. Yang, B. Xiong, M. Han and F. Chen, *J. Power Sources*, 2011, **196**, 9164, DOI: <https://doi.org/10.1016/j.jpowsour.2011.06.096>
- S67.** D. Han, H. Wu, J. Li, S. Wang and Z. Zhan, *J. Power Sources*, 2014, **246**, 409, DOI: <https://doi.org/10.1016/j.jpowsour.2013.07.113>
- S68.** S. F. Wang, H. C. Lu, Y. F. Hsu and P. Jasinski, *Int. J. Hydrogen Energy*, 2022, **47**, 5429, DOI: <https://doi.org/10.1016/j.ijhydene.2021.11.132>
- S69.** J. H. Joo, D. Y. Kim and G. M. Choi, *Electrochem. Solid-State Lett.*, 2009, **12**, B65, DOI: <https://doi.org/10.1149/1.3086261>
- S70.** L. Ma, Y. Wang, W. Li, B. Guan, H. Qi, H. Tian, L. Zhou, H. A. De Santiago and X. Liu, *J. Power Sources*, 2021, **488**, 229458, DOI: <https://doi.org/10.1016/j.jpowsour.2021.229458>
- S71.** Z. Tan, J. T. Song, A. Takagaki and T. Ishihara, *J. Mater. Chem. A*, 2020, **9**, 1530, DOI: <https://doi.org/10.1039/D0TA08564B>
- S72.** W. Wang, Z. Yang, H. Wang, G. Ma, W. Gao and Z. Zhou, *J. Power Sources*, 2011, **196**, 3539, DOI: <https://doi.org/10.1016/j.jpowsour.2010.12.037>
- S73.** Y. Lin and S. A. Barnett, *Electrochem. Solid-State Lett.*, 2006, **9**, A285, DOI: <https://doi.org/10.1149/1.2191132>
- S74.** W. Guo, J. Liu and Y. Zhang, *Electrochimica Acta*, 2008, **53**, 4420, DOI: <https://doi.org/10.1016/j.electacta.2008.01.039>
- S75.** Y. X. Liu, S. F. Wang, Y. F. Hsu and W. Y. Yeh, *Surf. Coat. Technol.*, 2018, **344**, 507, DOI: <https://doi.org/10.1016/j.surfcoat.2018.03.073>
- S76.** Y. P. Wang, J. T. Gao, J. H. Li, C. J. Li and C. X. Li, *Int. J. Hydrogen Energy*, 2021, **46**, 32655, DOI: <https://doi.org/10.1016/j.ijhydene.2021.07.121>
- S77.** A. R. Gilev, E. A. Kiselev and V. A. Cherepanov, *Solid State Ion.*, 2019, **339**, 115001, DOI: <https://doi.org/10.1016/j.ssi.2019.115001>
- S78.** J. Liu, Y. Lei, Y. Li, J. Gao, D. Han, W. Zhan, F. Huang and S. Wang, *Electrochem. Commun.*, 2017, **78**, 6, DOI: <https://doi.org/10.1016/j.elecom.2017.02.019>
- S79.** M. Zhang, C. Song, K. Lin, M. Liu, K. Du, K. Wen, T. Liu, J. Mao, X. Zhang, H. Liao and K. Zhou, *J. Therm. Spray Technol.*, 2024, **33**, 964, DOI: <https://doi.org/10.1007/s11666-024-01751-1>
- S80.** H. S. Yoo, S. Ju Kim, Y. T. Megra, J. Lee, J. W. Suk and W. Lee, *Appl. Surf. Sci.*, 2023, **639**, 158188, DOI: <https://doi.org/10.1016/j.apsusc.2023.158188>
- S81.** K. J. Kim, S. W. Choi, M. Y. Kim, M. S. Lee, Y. S. Kim and H. S. Kim, *J. Ind. Eng. Chem.*, 2016, **42**, 69, DOI: <https://doi.org/10.1016/j.jiec.2016.07.041>
- S82.** J. H. Wan, J. Q. Yan and J. B. Goodenough, *J. Electrochem. Soc.*, 2005, **152**, A1511, DOI: <https://doi.org/10.1149/1.1943587>
- S83.** M. Lo Faro and A. S. Aricò, *Int. J. Hydrogen Energy*, 2013, **38**, 14773, DOI: <https://doi.org/10.1016/j.ijhydene.2013.08.122>
- S84.** Z. Bi, B. Yi, Z. Wang, Y. Dong, H. Wu, Y. She and M. Cheng, *Electrochem. Solid-State Lett.*, 2004, **7**, A105, DOI: <https://doi.org/10.1149/1.1667016>
- S85.** S. P. Shafi, L. Bi, S. Boulfrad and E. Traversa, *J. Electrochem. Soc.*, 2015, **162**, F1498, DOI: <https://doi.org/10.1149/2.0701514jes>
- S86.** L. Bi, E. H. Da'as and S. P. Shafi, *Electrochem. Commun.*, 2017, **80**, 20, DOI: <https://doi.org/10.1016/j.elecom.2017.05.006>
- S87.** Y. Ma, B. He, J. Wang, M. Cheng, X. Zhong and J. Huang, *Int. J. Hydrogen Energy*, 2021, **46**, 9918, DOI: <https://doi.org/10.1016/j.ijhydene.2020.04.282>
- S88.** W. Sun, L. Yan, Z. Shi, Z. Zhu and W. Liu, *J. Power Sources*, 2010, **195**, 4727, DOI: <https://doi.org/10.1016/j.jpowsour.2010.02.012>
- S89.** L. Bi, E. Fabbri, Z. Sun and E. Traversa, *Energy & Environ. Sci.*, 2011, **4**, 1352, DOI: <https://doi.org/10.1039/C0EE00387E>
- S90.** J. Xiao, W. Sun, Z. Zhu, Z. Tao and W. Liu, *Mater. Lett.*, 2012, **73**, 198, DOI: <https://doi.org/10.1016/j.matlet.2012.01.032>
- S91.** I. Luisetto, S. Licoccia, A. D'Epifanio, A. Sanson, E. Mercadelli and E. Di Bartolomeo, *J. Power Sources*, 2012, **220**, 280, DOI: <https://doi.org/10.1016/j.jpowsour.2012.07.136>
- S92.** H. Bae, J. Choi, K. J. Kim, D. Park and G. M. Choi, *Int. J. Hydrogen Energy*, 2015, **40**, 2775, DOI: <https://doi.org/10.1016/j.ijhydene.2014.12.046>
- S93.** Z. Zhu, W. Sun, Z. Shi and W. Liu, *J. Alloys Compd.*, 2016, **658**, 716, DOI: <https://doi.org/10.1016/j.jallcom.2015.10.275>
- S94.** J. Xiao, H. Yuan, L. Chen, C. Xiong, J. Ma, Y. Zhao, J. Chai, W. Du and X. Zhu, *Int. J. Mod. Phys. B*, 2017, **31**, 1744062, DOI: <https://doi.org/10.1142/S0217979217440623>



- S95.** Z. Zhu, S. Wang, J. Shen, X. Meng, Y. Cao, Z. Wang and Z. Wei, *J. Alloys Compd.*, 2019, **805**, 718, DOI: <https://doi.org/10.1016/j.jallcom.2019.07.128>
- S96.** Z. Sun, E. Fabbri, L. Bi and E. Traversa, *J. Am. Ceram. Soc.*, 2012, **95**, 627, DOI: <https://doi.org/10.1111/j.1551-2916.2011.04795.x>
- S97.** D. Pergolesi, E. Fabbri and E. Traversa, *Electrochem. Commun.*, 2010, **12**, 977, DOI: <https://doi.org/10.1016/j.elecom.2010.05.005>
- S98.** W. Sun, Z. Shi, M. Liu, L. Bi and W. Liu, *Adv. Funct. Mater.*, 2014, **24**, 5695, DOI: <https://doi.org/10.1002/adfm.201401478>
- S99.** Z. Zhu and S. Wang, *Ceram. Int.*, 2019, **45**, 19289, DOI: <https://doi.org/10.1016/j.ceramint.2019.06.179>
